# Supplementary material for: Antioxidant and Nitric Oxide Inhibitory Activity of the Six Most Popular Instant Thai Curries
Source: MDPI journal article supplement (doi:10.3390/foods13020178), 2024-01-05
Supplement: s1 [file s1]

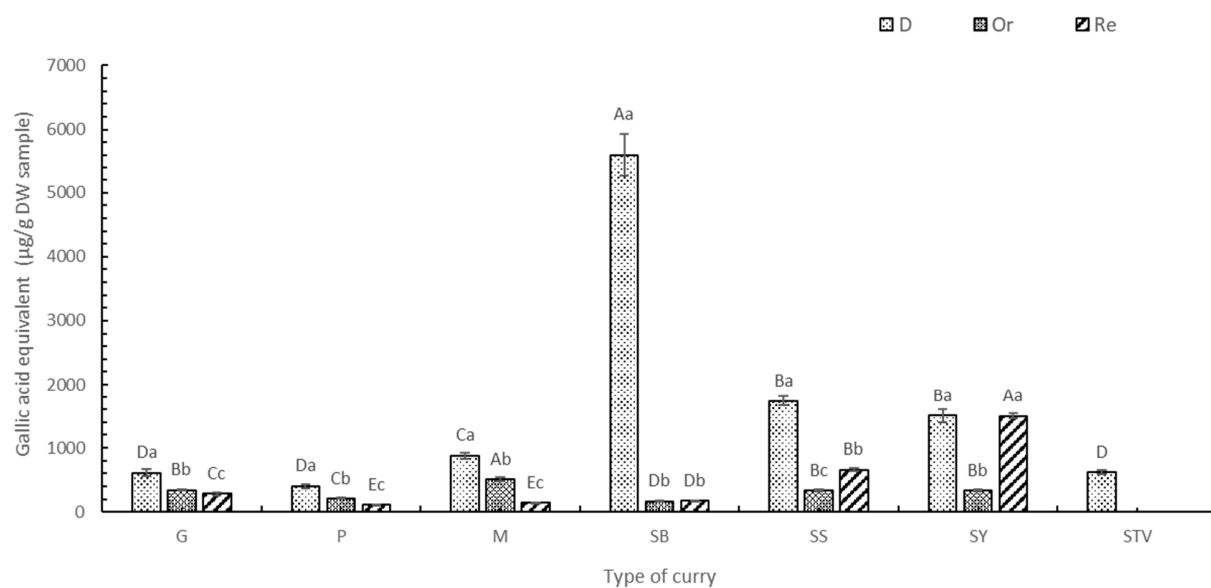

**Figure S1** TPC of curry and stevia extracts using gallic acid as a standard.

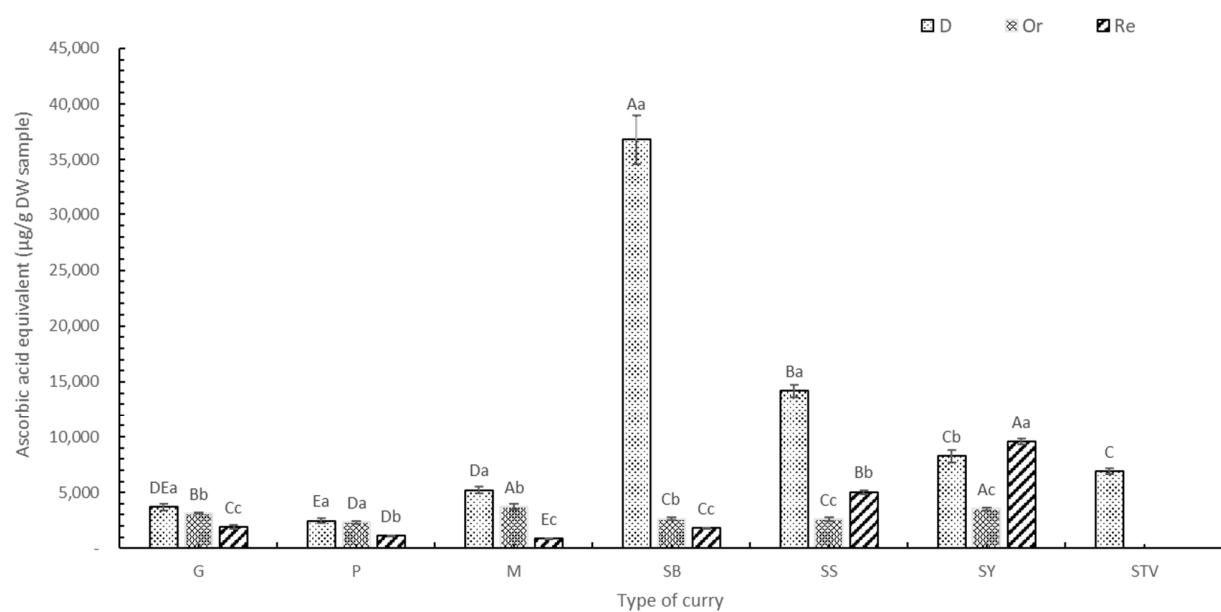

**Figure S2** TPC of curry and stevia extracts using ascorbic acid as a standard.

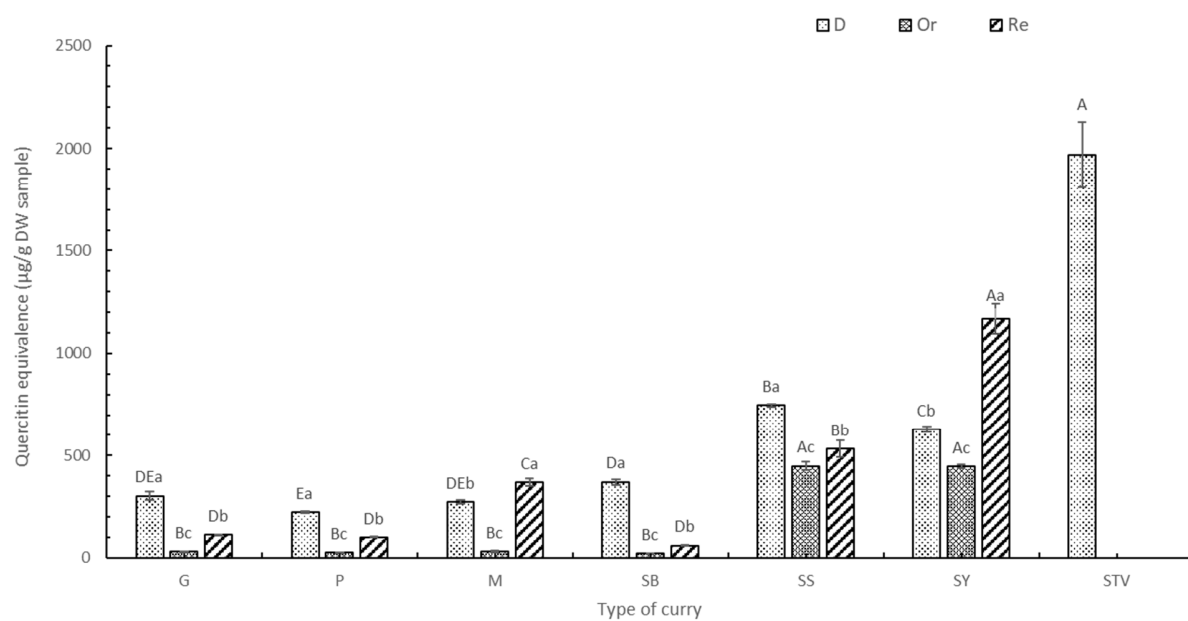

**Figure S3** TFC of curry and stevia extracts using quercetin as a standard.

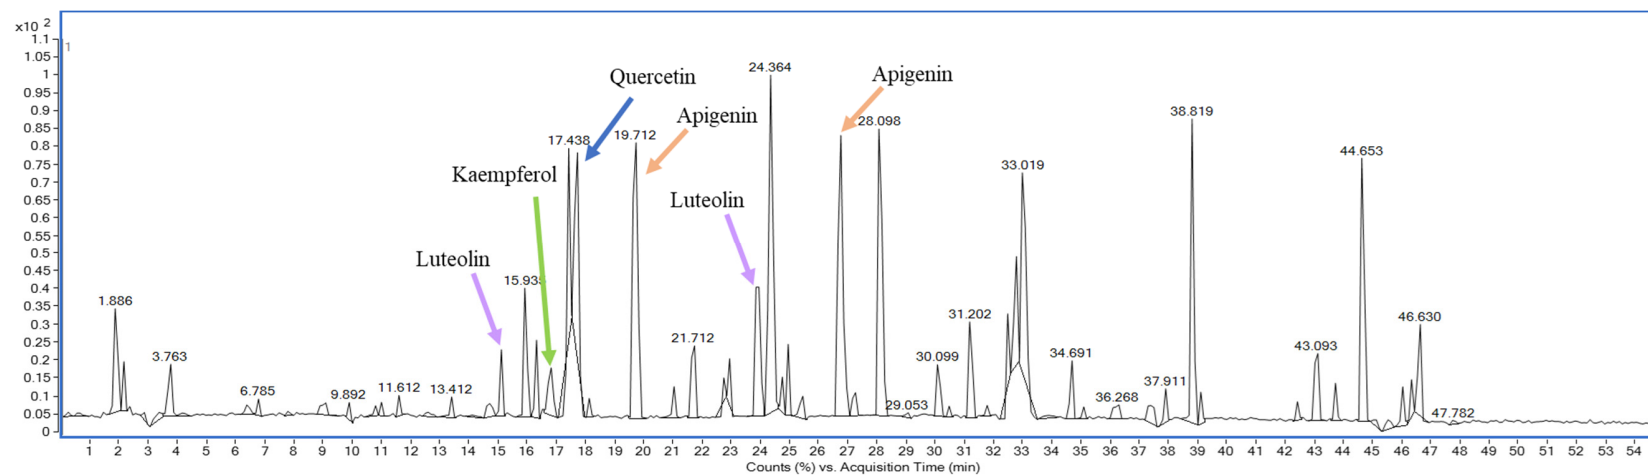

**Figure S4** Chromatogram of phenolic compounds found in green curry (G) deter-mined by LC-ESI-QTOF-MS/MS.

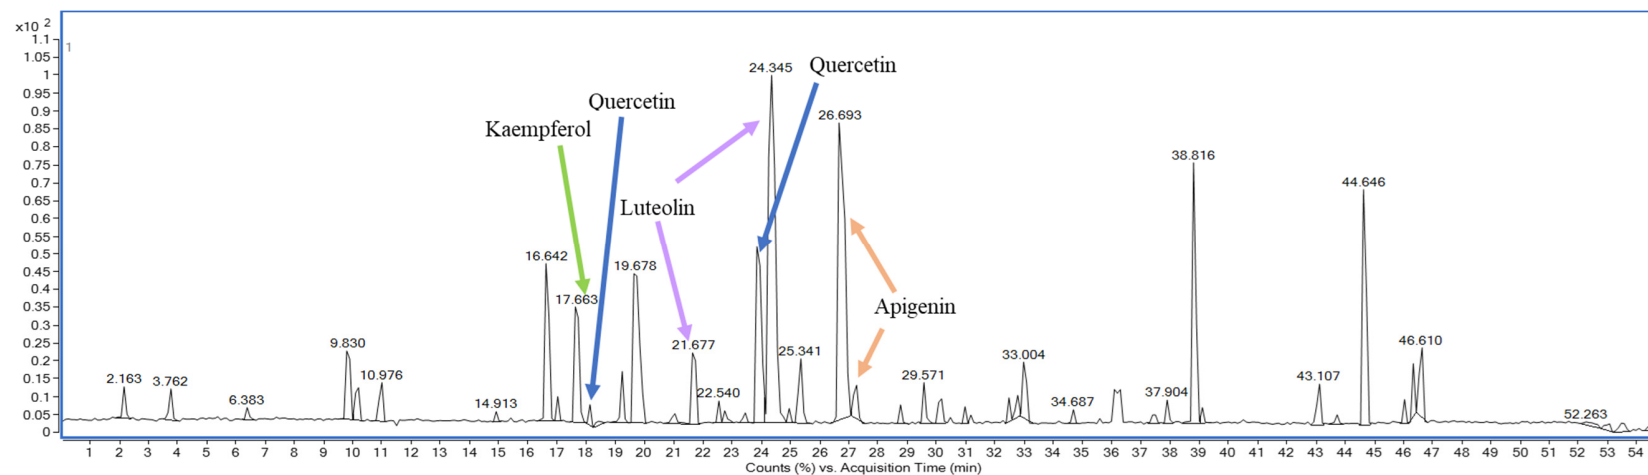

**Figure S5** Chromatogram of phenolic compounds found in Panang curry (P) deter-mined by LC-ESI-QTOF-MS/MS.

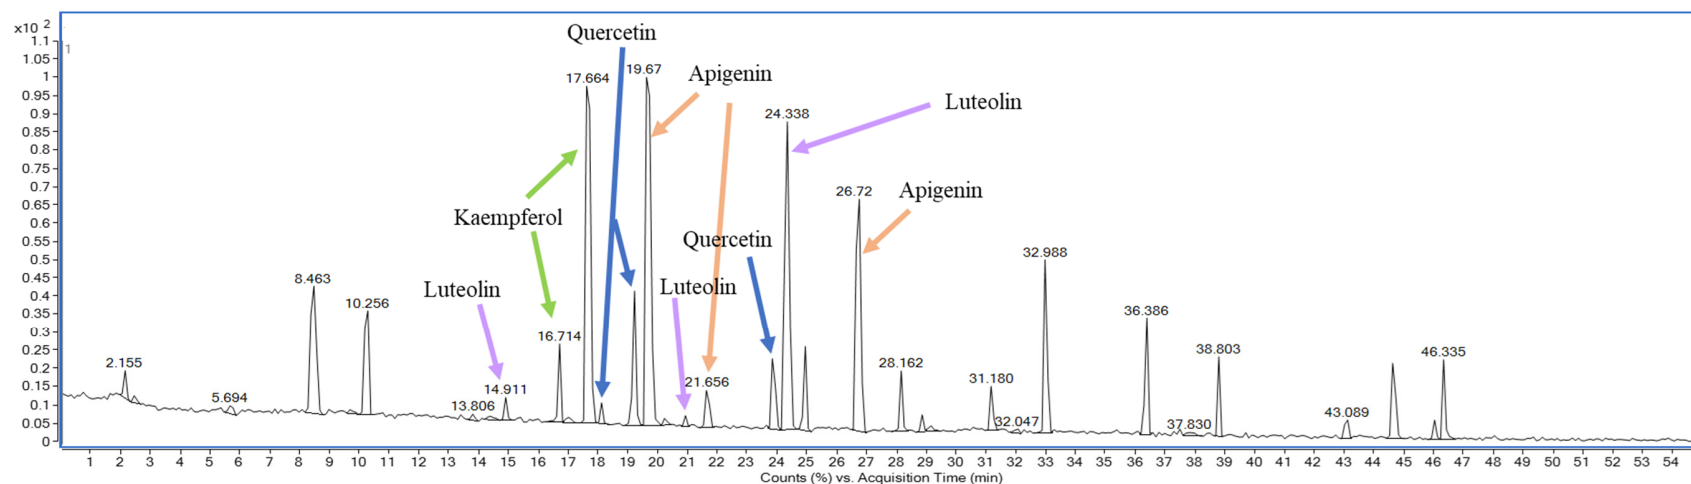

**Figure S6** Chromatogram of phenolic compounds found in Massaman curry (M) determined by LC-ESI-QTOF-MS/MS.

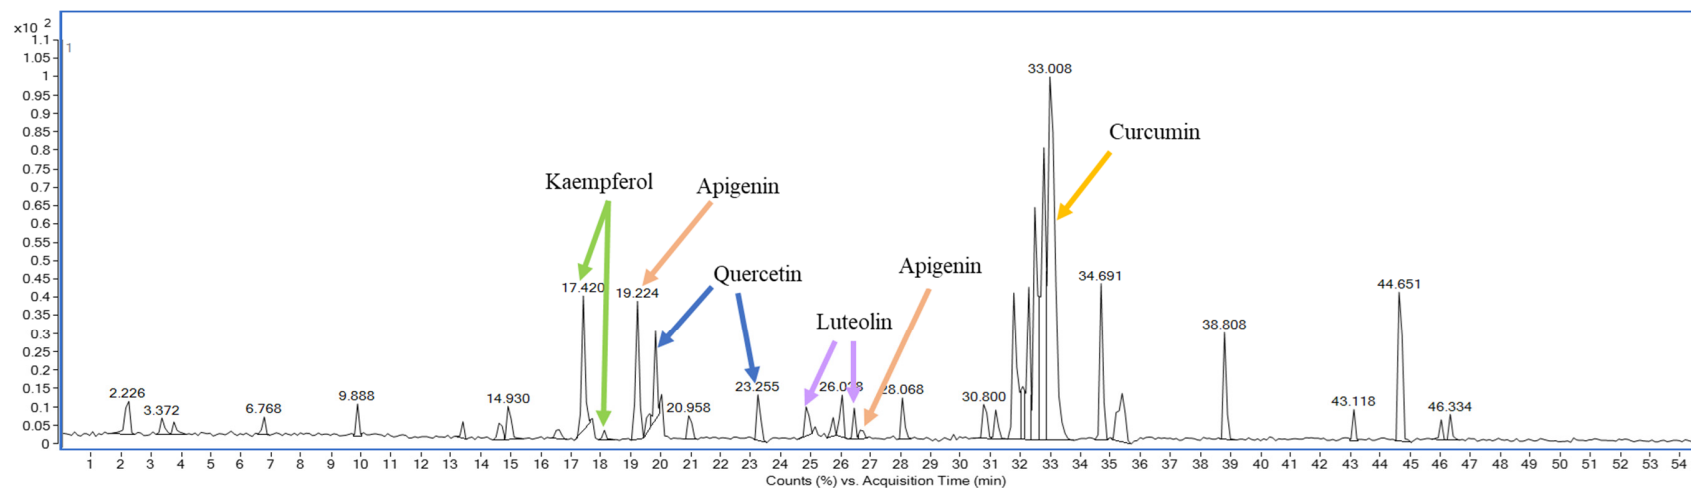

**Figure S7** Chromatogram of phenolic compounds found in southern sour curry (SS) determined by LC-ESI-QTOF-MS/MS.

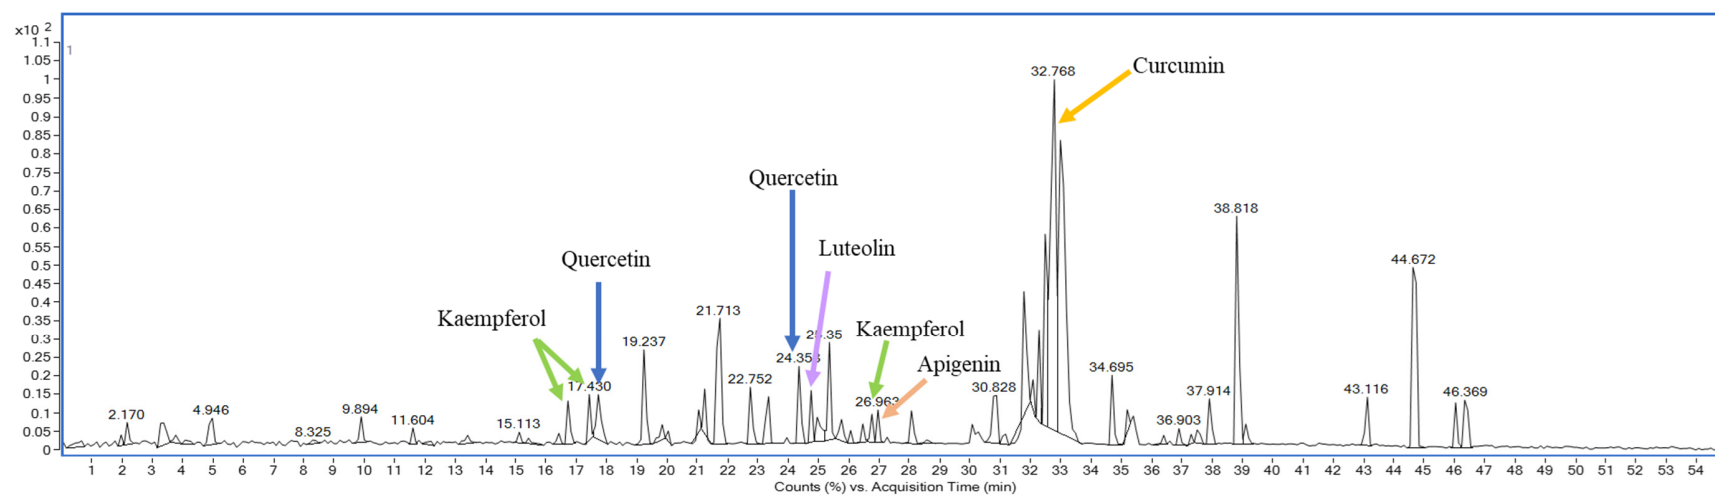

**Figure S8** Chromatogram of phenolic compounds found in southern spicy yellow curry (M) determined by LC-ESI-QTOF-MS/MS.

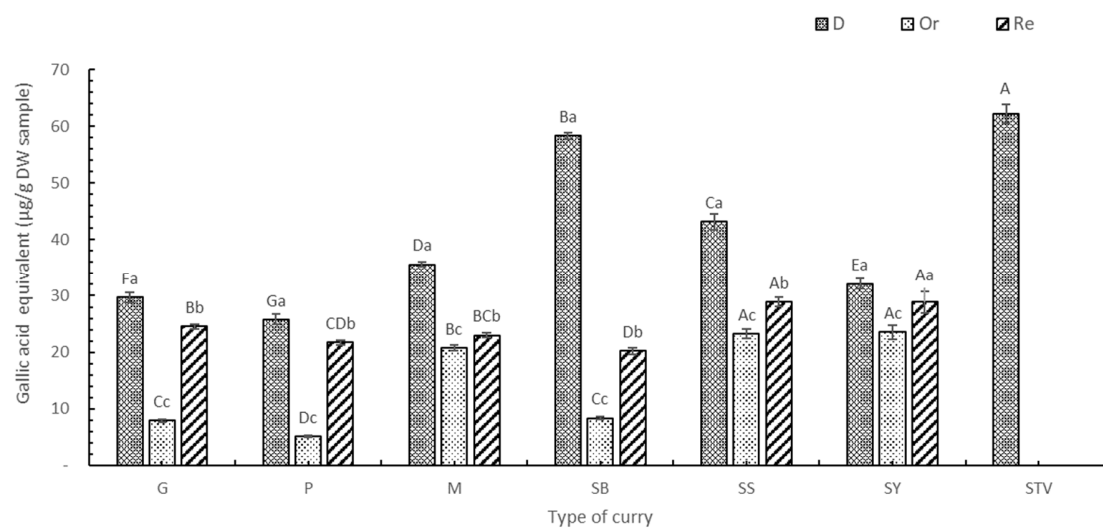

**Figure S9** DPPH of curry and stevia extracts using gallic acid as a standard.

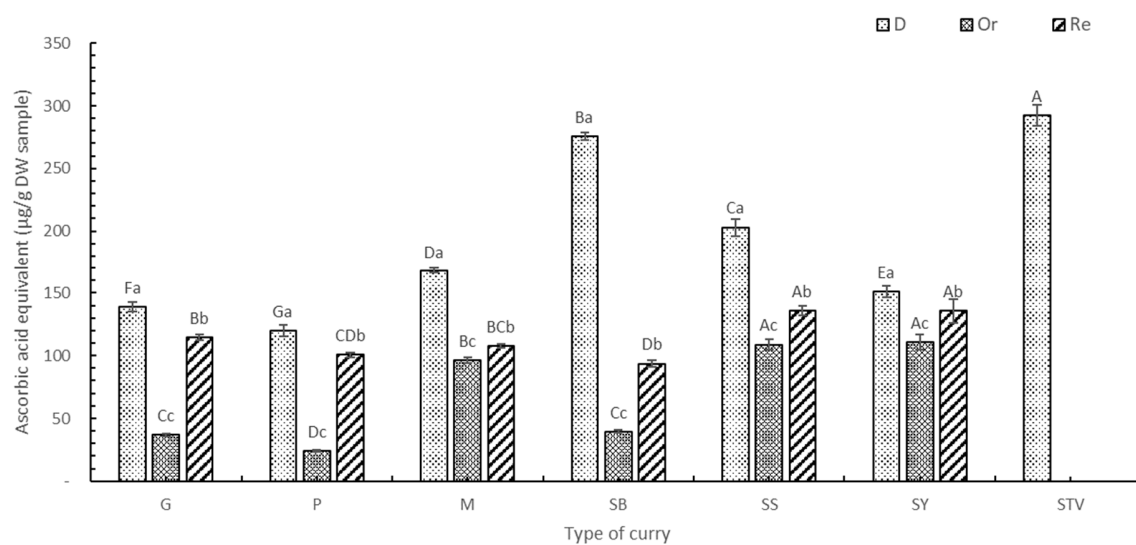

**Figure S10** DPPH of curry and stevia using ascorbic acid as a standard.

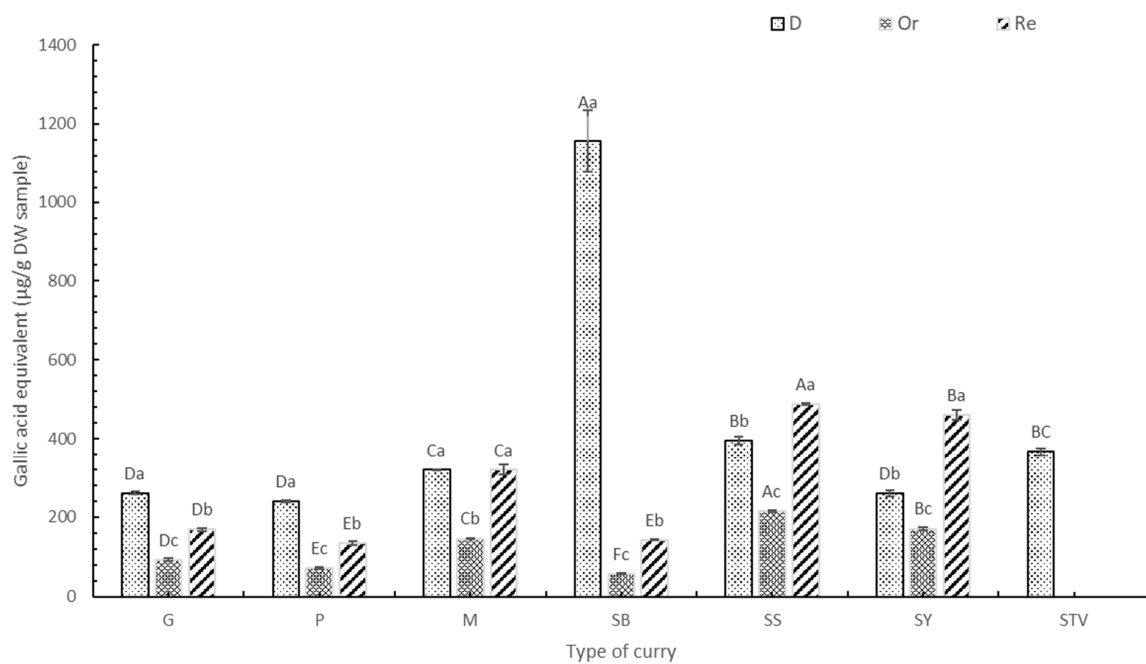

**Figure S11** ABTS of curry and stevia extracts using gallic acid as a standard.

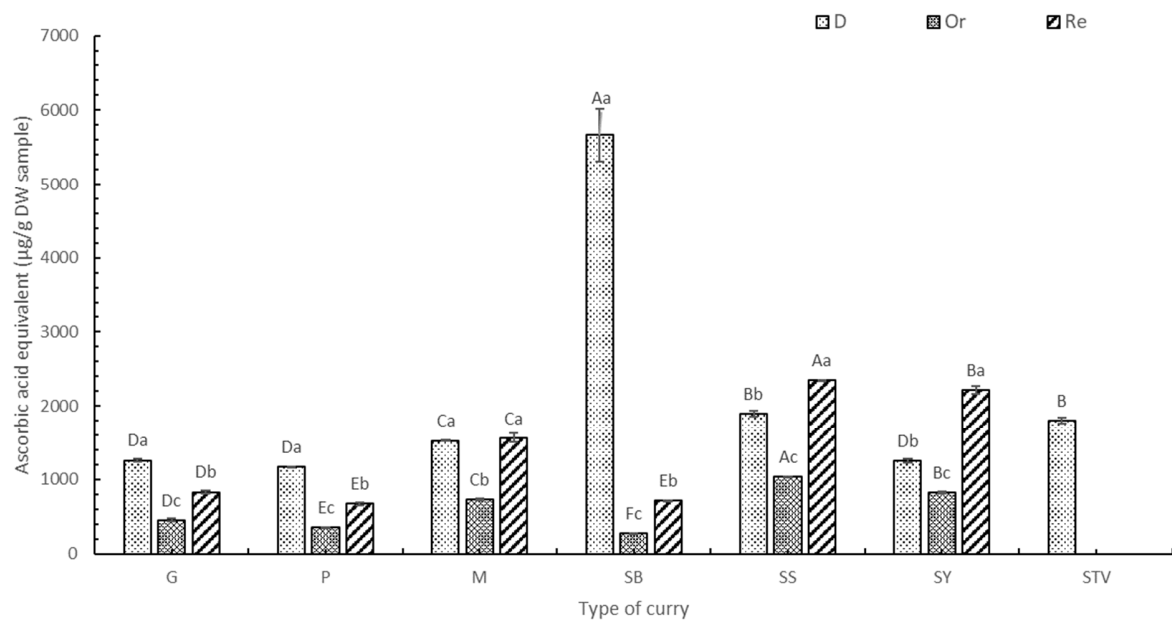

**Figure S12** ABTS of curry and stevia extracts using ascorbic acid as a standard.

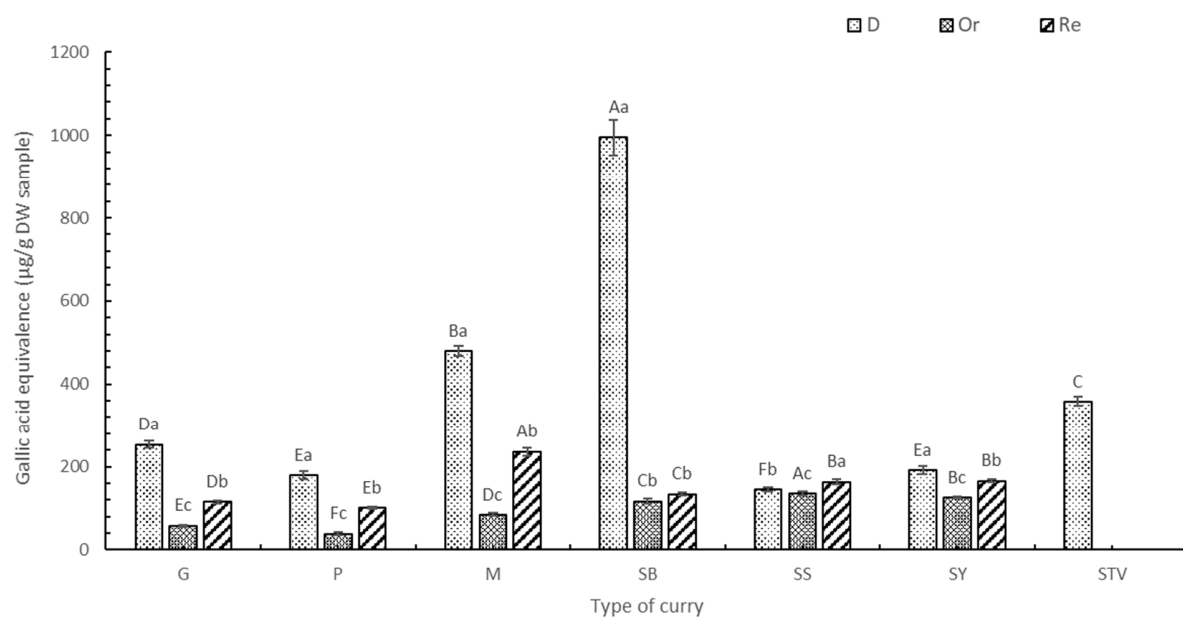

**Figure S13** FRAP of curry and stevia extracts using gallic acid as a standard.

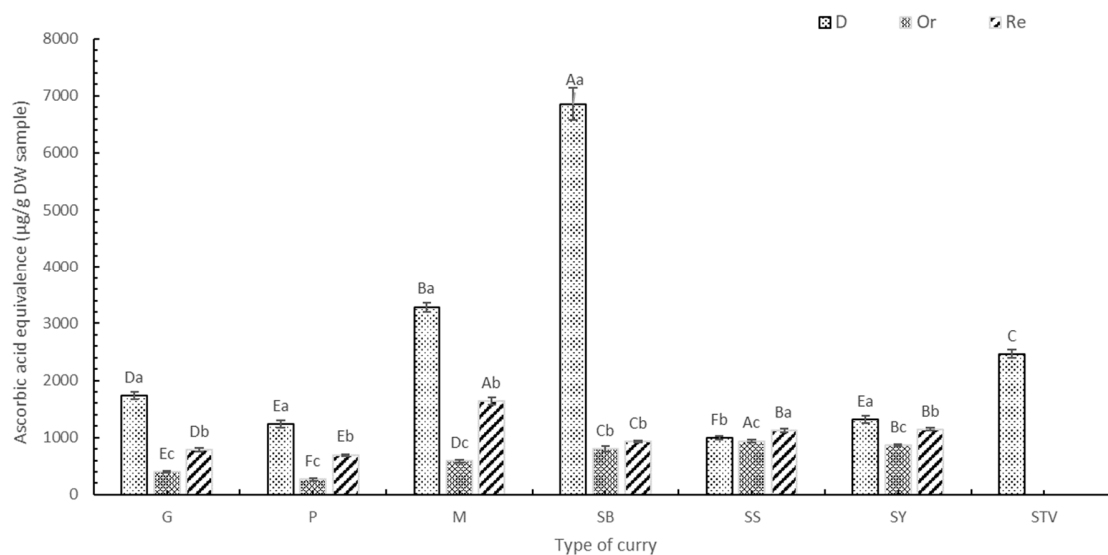

**Figure S14** FRAP of curry and stevia extracts using ascorbic acid as a standard.



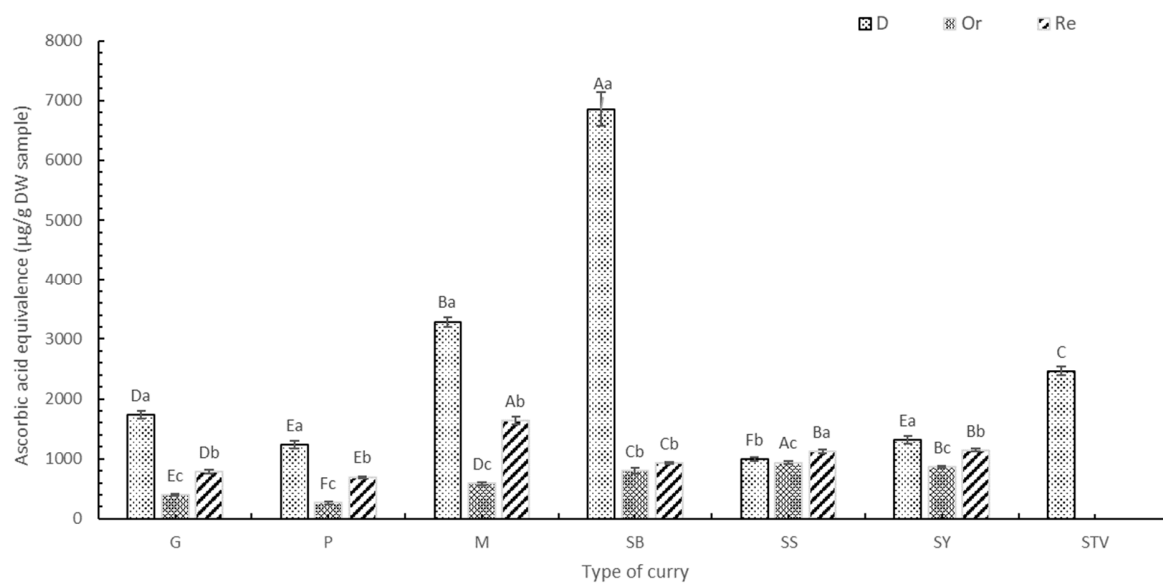

**Figure S15** FRAP of curry and stevia extracts using  $\text{FeSO}_4$  as a standard.
